1 **Modified one-step conservative surgery for placenta**  
2 **accreta spectrum versus caesarean hysterectomy:**  
3 **The CMNT PAS prospective comparative Non-**  
4 **Randomized pilot study.**

5

6

Hassine S ABOUDA, MD<sup>1,2</sup>

7

Haithem ALOUI, MD<sup>1,2</sup>

8

Sofiene B MARZOUK, MD<sup>1,3</sup>

9

Hatem FRIKHA, MD<sup>1,2</sup>

10

Rami HAMMAMI, MD<sup>1,2</sup>

11

Rachid HENTATI, MD<sup>1,2</sup>

12

Badis CHENNOUFI, MD<sup>1,2</sup>

13

Hayen MAGHREBI, MD<sup>1,3</sup>

14

15

<sup>1</sup> University of Tunis El Manar, Faculty of Medicine of Tunis

16

Tunis Maternity and Neonatology Center

17

<sup>2</sup> Department 'C' of Gynaecology and Obstetrics

18

<sup>3</sup> Department of Anaesthesiology and Intensive Care

19

Tunis, Tunisia

20

21 The authors have declared that no competing interests exist. The authors received no

22 specific funding for this work.

23 Address corresponding to:

24 Haithem Aloui, MD

25 Department 'C' of Gynaecology and Obstetrics

26 Tunis Maternity and Neonatology Center

27 La Rabta Jebbari, 1007 Tunis, Tunisia

28 Phone: 216 98 550020

29 Fax: 216 71 572 711

30 Email [alouihaitem85@gmail.com](mailto:alouihaitem85@gmail.com)

31 **Roles of protocol contributors:**

32 Frikha Hatem: Investigation. Hammami Rami: Software. Channoufi Mohamed Badis:

33 Supervision. Maghrebi Hayen: Validation. Abouda Hassine Saber: Conceptualization. B

34 Marzouk Sofiene: Formal analysis. Rachid Hentati: Methodology. Aloui Haithem: Writing –

35 original draft.

36 **Abstract word count:** 228

37 **Total word count:** 5574

38 **I. Why was this study conducted?**

39 Conducting a pilot study to determine the expected difference in estimated blood loss  
40 between conservative surgical treatment and caesarean hysterectomy in placenta accreta,  
41 as well as to ascertain the sample size required for a definitive study.

42 **II. What are the key findings?**

43 Regarding primary outcomes: estimated blood loss volume was lower in CG compared to  
44 CSG but not statistically significant. Our main goal is to determine the sample size for our  
45 principal study and provide adequate data for any other team wishing to study the

46 conservative surgical treatment of placenta accreta. So, for our original study, the sample  
47 size for a power of 90% and an alpha risk of 5%, the size of each group must be 22 patients.

### 48 III. What does this study add to what we already know?

49 Enabling other teams to compare conservative surgical treatment for placenta accreta with  
50 caesarean hysterectomy.

### 51 **Abstract:**

### 52 **Introduction:**

53 The surgical procedure known as one-step conservative surgery for placenta  
54 accreta spectrum involves the excision of the placenta and its attachment site on  
55 the myometrium. We aimed to conduct a non-randomized comparative study  
56 between conservative surgical treatment of placenta accreta spectrum and  
57 classical caesarean hysterectomy, under the name of the "CMNT PAS" study.  
58 To determine the sample size and the expected difference between the two  
59 groups, we conduct this pilot study.

### 61 **Study design:**

62 It was a monocentric prospective observational study from January 4, 2020, to  
63 August 17, 2022. Patients were allocated into two groups: Group Conservative  
64 Surgery (CSG) in which the method detailed in prior research by Palacios-  
65 Jaraquemada was slightly modified by our team, control group (CG) when the  
66 caesarean hysterectomy was performed.

### 68 **Results:**

69 Our main goal is to determine the sample size for our principal study and  
70 provide adequate data for any other team wishing to study the conservative  
71 surgical treatment of placenta accreta spectrum. So, the sample size for a power  
72 of 90% and an alpha risk of 5%, the size of each group must be 22 patients.  
73 Regarding primary outcomes: estimated blood loss volume was lower in CG  
74 compared to CSG but not statistically significant.

### 76 **Conclusion:**

77  
78 Our pilot study found that the caesarean hysterectomy is similar to conservative  
79 surgical treatment for placenta accreta in estimated blood loss. However, the  
80 latter helps preserve uterus and possibly fertility.

81

82 **Key words:**

83

84 caesarean hysterectomy, conservative management, placenta accreta spectrum,  
85 postpartum haemorrhage, transfusion.

86

87 **Introduction:**

88

89 Placenta accreta is often diagnosed postpartum when the placenta remains  
90 undelivered after childbirth. Attempting manual removal can lead to severe  
91 postpartum haemorrhage (PPH), posing life-threatening risks. The occurrence of  
92 placenta accreta is associated with abnormal invasion at the placental  
93 implantation site [1].

94 The surgical procedure known as one-step conservative surgery involves the  
95 excision of the placenta and its attachment site on the myometrium. This method  
96 has been detailed in prior research by Palacios-Jaraquemada JM [2, 3], upon  
97 which we have built with some modifications. We aimed to conduct a non-  
98 randomized prospective comparative study between conservative surgical  
99 treatment of placenta accreta spectrum and classical caesarean hysterectomy,  
100 under the name of the "CMNT PAS" study. The first obstacle we encountered  
101 was the absence of a similar study in the literature upon which to base the  
102 determination of the necessary sample size. The literature is rich in scattered  
103 clinical cases but lacks any comparative studies. The second obstacle we faced  
104 was determining the expected minimum difference. Therefore, we conducted  
105 this preliminary study necessary for the benefit of our research and the scientific  
106 community for future studies [4].

107 In this study, we intend also to conduct a simple comparison in a small series  
108 and will elaborate on the surgical technique in detail, in preparation for the main  
109 study: "CMNT PAS".

110

111 **Methods**

112

113 Our study took place in the Department "C" of Gynecology and Obstetrics in the  
114 Maternity and Neonatology Center of Tunis and started on January 4, 2020,  
115 following approval from the local ethics committee and the establishment of  
116 patient consent forms. The pilot study concluded on August 17, 2022, during  
117 which we determined the required sample size [4]. Subsequently, we proceeded  
118 with the main study, which concluded on January 30, 2024. We specify that the  
119 patients included in the pilot study were not integrated into the main study. On  
120 February 2, 2024, we deemed that the necessary data had been collected, and we  
121 terminated the study (Fig. 1).

122 We operate a Level 3 maternity unit equipped with a dedicated neonatology  
123 resuscitation team and an anaesthesia intensive care team specialized in

124 obstetrical pathologies, particularly adept at managing conditions that can lead  
125 to profuse bleeding (Fig. 2) and pose life-threatening risks.  
126 the recruitment of patients and their allocation into the two groups was carried  
127 out continuously throughout the duration of the study.

128

129 For this pilot study, we conducted a monocentric prospective observational case-  
130 control study. The study protocol was approved by the Ethics Committee of the  
131 Maternity and Neonatology Center of Tunis, Tunisia (approval no.  
132 03102020). It is also registered in ClinicalTrials.gov (ID: NCT06253832) by  
133 respecting the 24 items in the WHO Trial Registration Data Set (TRDS) version  
134 1.3.1.

135 We declare that we have received no financial support and have no conflicts of  
136 interest.

137 Proficiency in the surgical technique, which involved specialized haemostasis  
138 and dissection maneuvers, was achieved by senior obstetrician who already has  
139 experience in managing placenta accreta spectrum [5]. All cases are operated on  
140 by the same surgeon.

141 Various formulas exist for assessing blood loss [6], but they have not been  
142 validated in pregnant women due to the influence of pregnancy-related  
143 variables. In our search, we identified a formula used specifically in the context  
144 of caesarean sections and in populations similar to ours. Consequently, we have  
145 chosen to utilize Brecher's formula [7, 8].

146

147 Following the acquisition of written informed consent, all patients undergoing  
148 scheduled or emergency caesarean section for placenta accreta were enrolled.  
149 The diagnosis was based on obstetrical imaging findings, either highly suspected  
150 or confirmed. MRI was routinely conducted for scheduled caesarean deliveries,  
151 while ultrasound sufficed for cases of delayed transfer or patients in active labor.

152

153 Based on imaging studies, false positives are around 30%, which is why it's  
154 essential to verify before surgical procedures [9], so our criteria of confirmation  
155 per-operative were:

- 156 ❖ Impossibility of manual removal of the placenta, without forcing.
- 157 ❖ Massive bleeding from the implantation site after placental removal.

158 Post-operative, histologic confirmation of PAS was obtained in all cases (Fig.  
159 2).

160 Delivery typically occurred at 36 weeks of gestation. The primary endpoints  
161 focused on safety, assessed through a composite outcome comprising estimated  
162 blood loss, changes in haemoglobin levels ( $\Delta$ HB), need for red blood cell  
163 transfusions, procedure duration, and transfer to the intensive care unit (ICU).

164 Secondary endpoints included ICU length of stay, incidence of intravascular  
165 disseminated coagulopathy, and occurrence of intraoperative complications such  
166 as gastrointestinal and bladder injuries.

167 The follow-up of patients during hospitalization is ensured by the obstetrics and  
168 anaesthesia-reanimation team of the CMNT to detect any potential  
169 complications.

170 Patients were stratified into two groups: the Conservative Surgery Group (CSG),  
171 where modified one-step conservative surgery was performed, and the Control  
172 Group (CG), which underwent emergent caesarean hysterectomy. The allocation  
173 was determined by the surgical technique and the decision of the attending  
174 surgeon.

175 Data was set and analyzed anonymously via SPSS software version 29.0.2.0  
176 Quantitative data was presented in means (SD) or medians (IQR) and compared,  
177 as suited, by Student's t test or Mann Whitney-U test. Fisher's exact test was  
178 used to compare proportions. A p-value  $< 0.05$  was needed for statistical  
179 significance.

180 So, first we checked the normality and homogeneity of variances of the two  
181 samples before deciding on the most appropriate statistical test. If the data pass  
182 the normality and homogeneity of variances tests, we can proceed with a  
183 student's t-test for independent samples. Otherwise, the Mann-Whitney U test  
184 will be more appropriate. To study the normality of variances, we used the  
185 Shapiro-Wilk Test. To test the homogeneity of variances, we used the Levene's  
186 Test. We used the software G\*Power 3.1.9.2 to calculate the sample size [10].  
187 To calculate the sample size required, the appropriate formula is as follows [11,  
188 12]:

189

$$n = \frac{2 \times s^2 \times (z_{\alpha} + z_{(1-\beta)})^2}{(m_1 - m_2)^2}$$

190

191

192 where  $(m_1 - m_2)$  is the minimum difference of interest to detect.  $S^2$  is the  
193 common variance assumed to be the same in both groups. It can be calculated by  
194 the formula:

$$s^2 = \frac{(n_1 - 1) \times s_1^2 + (n_2 - 1) \times s_2^2}{n_1 + n_2 - 2}$$

195

196 where  $s_1^2$  and  $s_2^2$  are the variances of the two groups and  $n_1$  and  $n_2$  are the  
197 sample sizes.

198 To illustrate and explain our surgical technique, we provided a maximum of  
199 photos and three explanatory videos. One video for the caesarean hysterectomy  
200 one for Modified one-step conservative surgery for placenta accreta spectrum,  
201 and a video for the insertion of a double lumen catheter.  
202

### 203 **Modified one-step conservative surgery for placenta accreta spectrum:**

204 We have included cases of placenta accreta (Fig 3D, 3H), increta (Fig 3B, 3C)  
205 and percreta (Figure 3E, 3F, 3G).

206 After appropriate conditioning and monitoring, the caesarean section was  
207 performed under spinal anaesthesia. Once placenta accreta spectrum is  
208 confirmed intraoperatively, the procedure is momentarily halted to administer  
209 general anaesthesia. This approach allows us to avoid unnecessary general  
210 anaesthesia in case of a false positive for placenta accreta spectrum.

211 Our modifications include the systematic placement of a double JJ probe under  
212 spinal anaesthesia [13] (S1. video).

213 The laparotomy was performed through a midline incision from the umbilicus to  
214 the pubic symphysis (Fig 4). Adhesion collapse is performed (Fig. 5). We  
215 prioritize ligation of newly formed blood vessels between the uterus and  
216 surrounding structures, careful dissection of the bladder (Fig. 6). Careful  
217 detachment of the bladder-uterus peritoneum (BUP) was then carried out to  
218 lower the bladder and reduce the risk of bladder wounds (Fig. 7).

219 Placental boundaries are identified through extrauterine palpation, followed by  
220 an adjusted transverse hysterotomy. Intrauterine palpation delineates the inferior  
221 margins of the placenta, guiding the later resection of the placental bed.

222 Here, we note that the original technique involves a fundal hysterotomy.

223 However, this results in two uterine incisions (Fig. 8), which can complicate  
224 reconstruction. As we further refine our technique, we have chosen a single  
225 incision approach to facilitate both foetal extraction and uterine reconstruction.  
226 (S2 video).

227 After foetal extraction, placenta is kept in place. The umbilical cord was ligated  
228 to its insertion, or a Jean Louis Faure forceps is placed, and the uterus was  
229 quickly sutured with the placenta kept in place (Fig. 9).

230 We also modified our approach by omitting the ligation of hypogastric arteries  
231 or uterine arteries [14, 15]. Instead, we applied a tourniquet [5].

232 We then proceed to meticulously remove the placental bed until healthy tissues  
233 are reached (Fig. 10). Inferiorly, the excision was performed 2 cm above the  
234 BUP to ensure an adequate amount of myometrium for facilitating closure.

235 Subsequently, uterine reconstruction is undertaken.

236 Regarding uterine reconstruction, the surgical assistant approximates the edges  
237 of the uterine defect. A variable number of separate myometrial stitches are then

238 performed as primary sutures. A second layer of simple interrupted sutures is  
239 performed to reinforce the reconstruction.  
240 Anterior defects encompassing up to 50% of the uterine circumference were  
241 deemed appropriate for uterine repair. The tourniquet was immediately removed  
242 after finishing uterine repair. The JJ probe is removed post-surgery, and  
243 haemostasis is ensured through the modified B-Lynch suturing technique. This  
244 is also a modification introduced to the original technique (Fig. 11).  
245 Postoperative bladder assessment is systematically conducted using a  
246 physiological serum. The surgeon places a drain in the Douglas pouch following  
247 intraperitoneal irrigation. The figure 12 summarizes the surgical technique.

#### 248 **Caesarean hysterectomy:**

249  
250  
251 A midline laparotomy incision was made extending from the umbilicus to the  
252 pubic symphysis. The hysterotomy was performed away from the placental  
253 insertion site. Placenta accreta was assessed clinically post-delivery, but manual  
254 placental removal was not attempted. The umbilical cord was ligated at its  
255 insertion, and the uterus was promptly sutured while maintaining the placenta in  
256 situ. Delicate dissection of the bladder-uterus peritoneum (BUP) was then  
257 conducted to lower the bladder and minimize the risk of bladder injury.  
258 Following removal of the BUP, a Foley catheter (CH18) was placed in the lower  
259 segment, and a double knot was tied anteriorly. The tourniquet was removed  
260 immediately upon completion of the hysterectomy (Fig. 13, S3 video).

#### 261 **Different approaches for Placenta accreta spectrum:**

262 Three distinct approaches have emerged in the management of abnormal  
263 placentation: the American radical method, most commonly involving caesarean  
264 hysterectomy [1, 16], which poses challenges, particularly for younger women;  
265 the conservative method, widely employed in France, entails leaving the  
266 placenta in situ [17]. This approach, despite its historical use dating back to the  
267 first successful treatment published in 1933 [18], may entail postoperative  
268 complications such as haemorrhage, disseminated intravascular coagulation,  
269 retained placental infection, and sepsis. It can lead to secondary hysterectomy  
270 with a rate of 22% [19]. Although it is associated with a risk of recurrent  
271 placenta accreta [16] Additionally, uterine-sparing surgical techniques have  
272 been developed [20].

273 In 2004, Palacios-Jaraquemada JM of Buenos Aires, Argentina, introduced a  
274 novel conservative surgical technique known as one-step conservative surgery  
275 for placenta percreta.[21]. The surgeon himself describes this technique as



276 complex. [16]. Thus, despite its potential benefits, adoption of this technique  
277 remains limited, largely due to the misconception that it is a complex procedure  
278 requiring extensive training and applicable to only a select few patients [20].  
279 Consequently, efforts have been made to simplify the one-stage conservative  
280 surgery for placenta accreta spectrum through step-by-step approaches [20].

281 Various teams have also attempted to adopt and modify this technique under  
282 different names [22, 23]. For instance, the triple P procedure [23] involves  
283 perioperative placental localization and delivery of the foetus through a  
284 transverse uterine incision above the upper border of the placenta, pelvic  
285 devascularization, and placental non-separation, often requiring uterine  
286 devascularization and intravascular balloon placement, which may be  
287 challenging in standard maternity facilities. This technique is primarily indicated  
288 for cases of placenta percreta. In the 4 cases reported, the average intraoperative  
289 blood loss was 500 mL or less.

290 Another variation, the two-step conservative surgery, is employed when ideal  
291 surgical conditions for hysterectomy are lacking (e.g., lack of an experienced  
292 team, limited blood, or other resources). In this procedure, like one-step  
293 conservative surgery, the placenta is left in situ initially, with the option for  
294 hysterectomy or conservative treatment thereafter. Tissue dissection in cases of  
295 two-step surgery is typically easier and associated with reduced bleeding  
296 compared to one-step dissection [16].

297 Additionally, a modified approach termed one-stage modified conservative  
298 uterine surgery (MOSCUS) has been outlined [24]. MOSCUS involves a  
299 combination of uterine myometrial resection and transverse B-Lynch suture.

300  
301 In conjunction with these approaches, interventional radiology techniques such  
302 as uterine artery embolization and intravascular balloon placement are variably  
303 associated but face challenges in finding widespread acceptance. Indeed, in the  
304 context of caesarean hysterectomies, a range of supplementary management  
305 strategies has been proposed, including intraoperative embolization and  
306 preoperative placement of intravascular balloons. Specifically, there is interest  
307 in uterine artery embolization post-foetal extraction and preceding  
308 hysterectomy. This approach has shown promising outcomes, notably in  
309 reducing blood loss, decreasing the need for transfusions, and minimizing the  
310 volume of packed red blood cells required. However, outcomes regarding  
311 intravascular balloon placement have displayed variability. It's worth noting that  
312 the available evidence primarily consists of retrospective analyses with  
313 relatively small sample sizes [1].

314 In Tunisia, the prevailing method is caesarean hysterectomy, with or without

|  | CSG* (n=6) | CG†(n=6) | $p^{\Omega}$ | TF <sup>μ</sup> | TM <sup>π</sup> |
|--|------------|----------|--------------|-----------------|-----------------|
|--|------------|----------|--------------|-----------------|-----------------|

315 concurrent utilization of uterine-sparing surgical techniques. Our team has not  
316 assigned a specific name to our technique, as various groups are still refining the  
317 adaptation of one-step conservative surgery for placenta accreta spectrum. This  
318 technique was initially described for placenta percreta but suffered from a lack  
319 of reproducibility due to its complexity. Therefore, we attempted to simplify it  
320 by selecting non-percreta placentas and making some modifications.  
321 The two figures 11 and 12 summarize the surgical technique for placenta  
322 percreta, the most difficult situation.

323

### 324 **Results:**

325

326 During the pilot study phase, a cohort of 12 patients was recruited, with 6  
327 patients allocated to the CSG and 6 patients to the CG. Baseline characteristics,  
328 encompassing demographic, obstetrical, medical, and surgical history (as  
329 detailed in Table 1), were comparable between the two study groups.

330

331 Table 1. Baseline Characteristics

|                                             |                      |                     |                 |        |        |
|---------------------------------------------|----------------------|---------------------|-----------------|--------|--------|
| Age mean (SD), y                            | 33.67 ± 3.08 [31-39] | 37.17 ± 2.3 [34-42] | NS <sup>§</sup> | -      | -      |
| Parity median (IQR)                         | 2.5 [2-4]            | 4 [3-5]             | -               | -      | 0.093  |
| Gestivity median (IQR)                      | 3.5 [2-5]            | 4.5 [3-7]           | -               | -      | 0.0132 |
| Size mean (SD), inches                      | 63.39 ± 0.93         | 62.73 ± 0.6         | NS              | -      | -      |
| Weight mean (SD), pounds                    | 185.19 ± 9.25        | 189.6 ± 10.25       | NS              | -      | -      |
| Diabetes, No.                               | 3                    | 4                   | -               | 0.024  | -      |
| Gynecological scar, No.                     | 0                    | 1                   | -               | -      | -      |
| Number of caesarean sections median (SD)    | 1.5 ± 0.55           | 3.5 ± 1.27          | -               | -      | 0.065  |
| History of uterine aspiration, No.          | 2                    | 0                   | -               | <0.001 | -      |
| Baseline Hb <sup>‡</sup> median (IQR), g/dl | 12.45 [11.9-14.8]    | 11 [9.9-15.1]       | -               | -      | 0.065  |

332

333

334 \*Conservative Surgery group, † Control group, ‡ Haemoglobin, § non-significant, £ Test de

335 Levene, ∞ Test de Shapiro-Wilk, Ω Test t de Student for independent samples, μ Fisher's

336 exact test, Π Test de Mann-Whitney U.

337

338

339 All our placentas were anterior, type 1 and 2. Intraoperatively, they were all  
 340 accreta, with no cases of placenta percreta. Concerning primary outcomes:  
 341 Estimated blood loss volume (Fig. 14: showing normality of the variance) who  
 342 let us determine sample size was similar in the CG group compared to the CSG  
 343 group (1298 ml vs 891 ml, p =0.159) (Fig.15, Table 2).

344

345 Table 2. Primary outcomes

346

|                                                | CSG* (n=6)          | CG†(n=6)             | $p^{\Omega}$              | TF $^{\mu}$ |
|------------------------------------------------|---------------------|----------------------|---------------------------|-------------|
| Estimated blood loss, mean (SD), ml            | 1298.04±556         | 891.051±348          | 0.159 (ns $^{\text{¥}}$ ) | -           |
| Lowest per operative Hb, mean (SD), g/dl       | 10± 1.16 [8.2-11.3] | 9.55 ± 1.29 [8-11.4] | 0.539 (ns)                | -           |
| $\Delta$ Hb $^{\ddagger}$ , median (IQR), g/dl | 2.5 [1-4.7]         | 1.8 [0.9-3.7]        | 0.24 (ns)                 | -           |
| Transfused RBC $^{\S}$ , median (IQR), units   | 2 [0-9]             | 1 [0-4]              | 0.334 (ns)                | -           |
| Surgery duration, mean (SD), minutes           | 125±65.34           | 190±60.66            | 0.104 (ns)                | -           |
| ICU $^{\parallel}$ transfer, No.               | 3                   | 2                    | -                         | 0.017       |

347

348

349 \*Conservative Surgery group, † Control group, ‡ Hemoglobin variation, § Red Blood cell, ||  
 350 Intensive care unit, ¥ non-significant,  $\Omega$  Test t de Student for independent samples,  $\mu$  Fisher's  
 351 exact test.

352

353 Our main goal is to determine the sample size for our principal study and  
 354 provide adequate data for any other team wishing to study the conservative  
 355 surgical treatment of placenta accreta. So, for our original study, to have a  
 356 minimum reduction of 407 ml in our endpoint, namely estimated blood loss, the  
 357 sample size for a power of 80% and an alpha risk of 5%, the size of each group  
 358 must be 22 patients.

359

360 Haemoglobin variation also was similar between the two groups (2.5 g/dl vs 1.8  
 361 g/dl,  $p=0.24$ ). Patients in the CSG group require twice units of red blood  
 362 comparing to CG. The rate of ICU transfer was 3 vs 2 (CSG vs CG). Surgery  
 363 duration was 125 minutes in CG vs 190 minutes in CSG ( $p=0.104$ ) (Table 2).  
 364 No related maternal deaths were noted either in the early or in the late  
 365 postoperative period.

366

367 At this stage of the study, regarding fertility, only one patient underwent  
 diagnostic hysteroscopy and laparoscopy due to fertility desire: the right ostium

368 showed no anomalies, the left ostium was obscured, and there was evidence of  
369 chronic endometritis lesion (video). During laparoscopy, omental adhesions to  
370 the anterior abdominal wall were observed at the level of the median scar. The  
371 uterus appeared normal, with no bilateral passage of methylene blue.  
372 We encountered no bladder or digestive wounds. Only one patient in the  
373 conservative treatment group had clotting disorder (Table 3).

374

375 Table 3. Secondary endpoints

376

|                                                     | CG <sup>†</sup> (n=6) | CSG* (n=6)          |
|-----------------------------------------------------|-----------------------|---------------------|
| Bladder wounds                                      | 0                     | 0                   |
| Digestive wounds                                    | 0                     | 0                   |
| Clotting disorders                                  | 1                     | 0                   |
| Length of stay ICU <sup>  </sup> mean, No.<br>(day) | 2 (1)                 | 3 (2.33)            |
| Length of stay postoperative,<br>mean (SD), day     | 3.33 ± 1.211 [2, 5]   | 3.17 ± 0.753 [2, 4] |

377 \*Conservative Surgery group, † Control group, || Intensive care unit

378

379

## 380 Discussion:

381 In our pilot study, our goal is to determine the sample size. So, to have a  
382 minimum reduction of 407 ml in our endpoint, namely estimated blood loss, the  
383 sample size must be 22 patients.

384 Recognizing the inherent limitations in the prenatal diagnosis of placenta accreta  
385 spectrum (PAS), it's important to note that achieving a precise correlation  
386 between imaging findings and complications remains challenging [25].

387 However, in clinical practice, the extent of invasion serves as a valuable  
388 indicator for anticipating complications and estimating blood loss [26]. Notably,  
389 Type 1 PAS predominates, representing approximately 80% of cases.

390 Importantly, this subtype tends to present with reduced haemorrhagic risks and a  
391 higher likelihood of successful conservative reconstructive interventions  
392 compared to other subtypes. In our study, we had only type 1 and 2.

393 Recent research findings indicate that MRI has demonstrated potential in  
394 identifying individuals at risk of caesarean hysterectomy by assessing  
395 myometrial invasion. With a sensitivity of 96% for predicting hysterectomy,  
396 specific cutoff values have been proposed: 3.5 for the placenta accreta index  
397 derived from ultrasound, and 2.5 cm for the maximum dimension of invasion as  
398 determined by magnetic resonance imaging [27]. All our patients had an MRI  
399 because it allows us to better study the insertion of the placenta accreta [26].

400

401 In the obstetric setting, a comprehensive patient history should always include  
402 inquiries regarding any history of "unsafe abortion" [28]. This proactive  
403 approach helps clinicians anticipate potential challenges, especially in cases of  
404 low parametrial invasions [29]. In such scenarios, employing techniques like  
405 ureteral catheterization or surgical identification becomes essential to mitigate  
406 the risk of inadvertent injuries. Nevertheless, it's crucial to recognize that despite  
407 the diligent application of preventive measures, complete avoidance of damage  
408 may not always be feasible [29]. In our study, all cases had jj probe and no  
409 bladder injuries.

410

411 A significant study published in 2021, known as the "PACCRETA study" [30],  
412 found that conservative management exhibited lower incidences of transfusion  
413 exceeding >4 units of packed red blood cells, hysterectomy, total estimated  
414 blood loss exceeding 3000 mL, any blood product transfusion, and adjacent  
415 organ injury. However, it was associated with higher rates of embolization,  
416 endometritis, and readmission within 6 months compared to caesarean  
417 hysterectomy, but it talks about conservative treatment where the placenta is left  
418 in place.

419 Upon literature review, our study emerges as the inaugural pilot investigation  
420 centring on the prospective comparative analysis between conservative surgical  
421 intervention and caesarean hysterectomy for placenta accreta. In practice, the  
422 management, and outcomes of placenta accreta spectrum (PAS) exhibit  
423 significant variation across countries and hospitals among the same country,  
424 often relying on expert consensus rather than level I evidence. Regrettably, most  
425 clinical inquiries regarding PAS management lack prospective data [31].

426

427 The various adaptations of the conservative technique [22, 27] have shown  
428 improvements in blood loss and complications compared to our initial  
429 observations. These data will be further consolidated in a larger series in the  
430 principal study. The absence of vascular ligations in our practice may be a  
431 contributing factor. However, it's noteworthy that we haven't experienced any  
432 deaths thus far. Moreover, the slightly elevated blood loss, albeit not  
433 significantly, could advocate for the preservation of the uterus and,  
434 subsequently, fertility. This warrants careful consideration, especially in  
435 obstetric practice.

436 One limitation of our study lies in the non-randomized allocation of groups, left  
437 to the discretion of the attending surgeon. Undeniably, this introduces a  
438 significant source of bias. However, given the critical prognosis associated with  
439 this pathology and the variability in intraoperative findings among patients, such  
440 an approach was deemed necessary [31]. A recent review highlights that  
441 randomized controlled trials are not invariably considered the "gold standard"  
442 for evidence in obstetrics and gynecology [32].

443 In a previous study, we demonstrated that the use of a tourniquet in caesarean  
444 hysterectomy for placenta accreta could reduce bleeding [5]. Continuing in this  
445 line to improve the management of placenta accreta, we decided to conduct a  
446 study comparing conservative surgical treatment to radical treatment by  
447 caesarean hysterectomy using tourniquet in CSG instead of arterial ligation. It  
448 may seem unsafe not to perform vascular ligations, but we found that there is a  
449 gain in operating time and avoidance of complications such as vascular injury  
450 and bleeding using tourniquet [5]. The prospect of enrolling women in a  
451 substantial randomized controlled trial to ascertain the optimal management  
452 strategy for this uncommon yet critical condition appears unlikely.  
453 Observational cohort studies based on population data present a promising  
454 alternative for evaluating the outcomes linked with the intended delivery method  
455 in a diverse cohort of women affected by this condition [30]. This is why we  
456 opted for a prospective observational non-randomized cohort study.

457  
458

### 459 **Conclusion:**

460

461 In our pilot study, our goal is to determine the sample size. So, to have a  
462 minimum reduction of 407 ml in our endpoint, namely estimated blood loss, the  
463 sample size must be 22 patients.

464 We found that the caesarean hysterectomy is similar to conservative surgical  
465 treatment for placenta accreta in estimated blood loss. However, the latter helps  
466 preserve uterus and possibly fertility.

467

### 468 **REFERENCES:**

469

470 1. Kayem G, Deneux-Tharoux C, Sentilhes L; PACCRETA group. PACCRETA: clinical situations at  
471 high risk of placenta ACCRETA/percreta: impact of diagnostic methods and management on  
472 maternal morbidity. *Acta Obstet Gynecol Scand.* 2013 Apr;92(4):476-82.

473

474 2. Palacios-Jaraquemada JM, D'Antonio F. Placenta Accreta Spectrum Disorder: Uterine  
475 Dehiscence, Not Placental Invasion. *Obstetrics and gynecology.* 2020;136(3):631.

476

477 3. Palacios-Jaraquemada JM, Fiorillo A, Hamer J, Martinez M, Bruno C. Placenta accreta  
478 spectrum: a hysterectomy can be prevented in almost 80% of cases using a resective-  
479 reconstructive technique. *The journal of maternal-fetal & neonatal medicine : the official  
480 journal of the European Association of Perinatal Medicine, the Federation of Asia and  
481 Oceania Perinatal Societies, the International Society of Perinatal Obstet.* 2022;35(2):275-82.

482

483 4. O'Neill B. Sample size determination with a pilot study. *PLoS One.* 2022 Feb  
484 15;17(2):e0262804.

485

- 486 5. Abouda HS, Marzouk SB, Boussarsar Y, Aloui H, Frikha H, Hammami R, Chennoufi B,  
487 Maghrebi H. Tourniquet on the low segment of the uterus reduces blood loss in postpartum  
488 hemorrhage during hysterectomy for placenta accreta: Old but gold. *Eur J Obstet Gynecol*  
489 *Reprod Biol X*. 2024 Feb 2;21:100285.  
490
- 491 6. Gibon E, Courpied JP, Hamadouche M. Total joint replacement and blood loss: what is the  
492 best equation? *Int Orthop*. 2013 Apr;37(4):735-9.  
493
- 494 7. Brecher ME, Monk T, Goodnough LT. A standardized method for calculating blood loss.  
495 *Transfusion*. 1997;37(10):1070-4.  
496
- 497 8. Dimassi K, Halouani A, Kammoun A, Ami O, Simon B, Velemir L, Fauck D, Triki A. The  
498 extraperitoneal French Ambulatory cesarean section technique leads to improved pain scores  
499 and a faster maternal autonomy compared with the intraperitoneal Misgav Ladach technique:  
500 A prospective randomized controlled trial. *PLoS One*. 2021 Jan 22;16(1):e0245645.  
501
- 502 9. Nieto-Calvache AJ, Benavides-Calvache JP, Hidalgo A, Padilla N, López-Tenorio J, Victoria  
503 A, Rengifo M, Mejía M, Vergara-Galliadi LM, Sinisterra-Díaz SE, Maya J, Zambrano MA,  
504 Burgos-Luna JM. Placenta Accreta Spectrum Prenatal Diagnosis Performance: Are Ultrasound  
505 False-positive Results Acceptable in Limited-resources Settings? *Rev Bras Ginecol Obstet*.  
506 2022 Sep;44(9):838-844.  
507
- 508 10. Kang H. Sample size determination and power analysis using the G\*Power software. *J*  
509 *Educ Eval Health Prof*. 2021;18:17.  
510
- 511 11. Ben Abdelaziz A, Ben Hassine D, Chebil D, Nouira S, Ben Abdelaziz A, Melki S, Barhoumi T,  
512 Ben Salem K. Descriptive Statistics in Health Sciences. *Tunis Med*. 2021  
513 *Décembre*;99(12):1117-1125. English.  
514
- 515 12. Kasiulevičius V, Šapoka V, Filipavičiūtė R. Sample size calculation in epidemiological  
516 studies. *Gerontologija*. 2006;7(4):225-31.  
517
- 518 13. Scaglione MA, Allshouse AA, Canfield DR, McLaughlin HD, Bruno AM, Hammad IA, Branch  
519 DW, Maurer KA, Dood RL, Debbink MP, Silver RM, Einerson BD. Prophylactic Ureteral Stent  
520 Placement and Urinary Injury During Hysterectomy for Placenta Accreta Spectrum. *Obstet*  
521 *Gynecol*. 2022 Nov 1;140(5):806-811.
- 522 14. Hobson SR, Kingdom JC, Murji A, Windrim RC, Carvalho JCA, Singh SS, Ziegler C, Birch C,  
523 Frecker E, Lim K, Cargill Y, Allen LM. No. 383-Screening, Diagnosis, and Management of  
524 Placenta Accreta Spectrum Disorders. *J Obstet Gynaecol Can*. 2019 Jul;41(7):1035-1049.  
525
- 526 15. Salim R, Chulski A, Romano S, et. al.: Precesarean prophylactic balloon catheters for  
527 suspected placenta accreta: a randomized controlled trial. *Obstet Gynecol* 2015; 126: pp.  
528 1022-1028  
529
- 530 16. Palacios-Jaraquemada JM. Cesarean section in cases of placenta praevia and accreta.  
531 *Best Pract Res Clin Obstet Gynaecol*. 2013 Apr;27(2):221-32.



532

533

534 17. McCall SJ, Deneux-Tharaux C, Sentilhes L, Ramakrishnan R, Collins SL, Seco A, Kurinczuk  
535 JJ, Knight M, Kayem G. Placenta accreta spectrum - variations in clinical practice and maternal  
536 morbidity between the UK and France: a population-based comparative study. *BJOG*. 2022  
537 Sep;129(10):1676-1685.

538

539

540 18. Capechi E. Placenta accreta abandonata in utero cesarizzato. Ritorno progressivo di  
541 questo allo stato normales enza alcuna complicitanza (reasorbimento autodigestione uterina  
542 della placenta?). Placenta accreta left in situ in utero with cesarea. Progressive restoration to  
543 normal state without any complication (Autodigestion and uterine placental reabsorption?)  
544 [In Italian]. *Policlin* 1933; 40: 347

545

546 19. Sentilhes L, Ambroselli C, Kayem G, Provansal M, Fernandez H, Perrotin F, et al. Maternal  
547 outcome after conservative treatment of placenta accreta. *Obstet Gynecol*. 2010;115:526–34.

548

549

550 20. Nieto-Calvache AJ, Palacios-Jaraquemada JM, Aryananda R, Basanta N, Aguilera R,  
551 Benavides JP, López J, Campos C, Valencia L, Arboleda K, Cabrera V, Cabrera J, Tavera-  
552 Martinez GM, Sinisterra S, Maya J, Peña T, Burgos-Luna JM, Messa A. How to perform the  
553 one-step conservative surgery for placenta accreta spectrum move by move. *Am J Obstet*  
554 *Gynecol MFM*. 2023 Feb;5(2):100802.

555

556

557 21. Palacios Jaraquemada JM, Pesaresi M, Nassif JC et al. Anterior placenta percreta: surgical  
558 approach, hemostasis and uterine repair. *Acta Obstet Gynecol Scand* 2004; 83: 738–744.

559

560

561 22. Simsek T, Saruhan Z & Karaveli S. Placenta percreta: conservative treatment-segmental  
562 uterine resection with placenta in one piece. *J Obstet Gynaecol* 2010; 30: 735–736.

563

564 23. Chandharan E, Rao S, Belli AM et al. The Triple-P procedure as a conservative surgical  
565 alternative to peripartum hysterectomy for placenta percreta. *Int J Gynaecol Obstet* 2012;  
566 117: 191–194.

567

568 24. Thi Pham XT, Bao Vuong AD, Vuong LN, Nguyen PN. A novel approach in the  
569 management of placenta accreta spectrum disorders: A single-center multidisciplinary  
570 surgical experience at Tu Du Hospital in Vietnam. *Taiwan J Obstet Gynecol*. 2023 Jan;62(1):22-  
571 30.

572

573 25. Takahashi H, Ohkuchi A, Usui R, Suzuki H, Baba Y, Matsubara S. Matsubara-Takahashi  
574 cervix-holding technique for massive postpartum hemorrhage in patients with placenta  
575 previa with or without placenta accreta spectrum disorders. *Int J Gynaecol Obstet*. 2018  
576 Mar;140(3):357-364.

577

- 578 26. Lim G, Horowitz JM, Berggruen S, Ernst LM, Linn RL, Hewlett B, Kim J, Chalifoux LA,  
579 McCarthy RJ. Correlation of probability scores of placenta accreta on magnetic resonance  
580 imaging with hemorrhagic morbidity. *J Clin Anesth*. 2016 Nov;34:261-9.  
581
- 582 27. Do QN, Herrera CL, Rosenthal EA, Xi Y, Uddin N, Lewis MA, Fei B, Spong CY, Twickler DM.  
583 Magnetic resonance imaging improves specificity of placenta accreta spectrum requiring  
584 hysterectomy compared to ultrasound. *Am J Obstet Gynecol MFM*. 2024 Jan 10;6(3):101280.  
585
- 586 28. Calvo-Aguilar O, Vásquez-Martínez J, Hernández-Cuevas P. Histerectomía obstétrica en el  
587 Hospital General Dr. Aurelio Valdivieso: revisión de tres años [Obstetric hysterectomy in the  
588 General Hospital Dr. Aurelio Valdivieso: three-year review]. *Ginecol Obstet Mex*. 2016  
589 Feb;84(2):72-8. Spanish.  
590
- 591 29. Crocetto F, Saccone G, Raffone A, Travaglino A, Gragnano E, Bada M, Barone B, Creta M,  
592 Zullo F, Imbimbo C. Urinary Incontinence after Planned Cesarean Hysterectomy for Placenta  
593 Accreta. *Urol Int*. 2021;105(11-12):1099-1103.  
594
- 595 30. Sentilhes L, Seco A, Azria E, et al. Conservative management or cesarean hysterectomy for  
596 placenta accreta spectrum: the PACCRETA prospective study. *Am J Obstet Gynecol*  
597 2022;226:839.e1-24.  
598
- 599 31. Einerson BD, Silver RM, Jauniaux E. Placenta accreta spectrum: welcome progress and a  
600 call for standardisation. *BJOG*. 2021 Sep;128(10):1656-1657.  
601
- 602 32. Oyelese Y. Randomized controlled trials: not always the "gold standard" for evidence in  
603 obstetrics and gynecology. *Am J Obstet Gynecol*. 2024 Apr;230(4):417-425.  
604

#### 605 **Figures legends:**

606 **Figure 1:** study periods.  
607  
608

609  
610 **Figure 2:** The number of surgical drapes and compresses used during a cesarean section for  
611 placenta accreta spectrum. **A:** emergency cesarian hysterectomy for PAS. **B:** Modified one-  
612 step conservative surgery for placenta accreta spectrum.  
613

614 **Figure 3:** The macroscopic appearance in pathological anatomy. **A:** Hysterectomy specimen  
615 for placenta accreta spectrum (PAS). **B, C:** placenta increta. **D, H:** placenta accreta. **E, F, G:**  
616 placenta percreta.  
617

618 **Figure 4:** Medline incision. **A:** tracing. **B:** Incision progression.  
619

620 **Figure 5:** Adhesion collapse. **A:** Exposure of the adhesion. **B:** The surgeon protects the  
621 bladder. **C:** Tracing the collapse line. **D:** The adhesion is nearly collapsed.  
622

623 **Figure 6:** Newly formed blood vessels. **A:** placenta percreta with newly formed blood vessels  
624 (blue arrow). **B:** careful dissection of the bladder (blue arrow).

625

626 **Figure 7:** Careful detachment of the bladder-uterus peritoneum (BUP). **A:** Appearance of  
627 placental protrusion through the uterine wall after lowering the BUP. **B:** Difficult peritoneal  
628 detachment.

629

630 **Figure 8:** Fundal hysterorrhaphy. **A:** Beginning of the hysterotomy line (blue arrow). **B:** Angle  
631 of the hysterorrhaphy. **C:** Beginning of hysterorrhaphy.

632

633 **Figure 9:** Result after non-modified one-step conservative surgery for placenta percreta. **A:**  
634 placenta percreta (two blue arrow). **B-C:** Uterine reconstruction and hysterorrhaphy sutures  
635 (white arrows).

636

637 **Figure 10:** line of healthy tissues (black arrow)

638

639 **Figure 11:** **A:** Exposure of the uterus by the surgical assistant. **B:** the modified B-Lynch  
640 suturing technique.

641

642 **Figure 12:** Modified one-step conservative surgery for placenta percreta. **A, B:** Intraoperative  
643 appearance of placenta percreta. **C:** Identification of the bladder. **D:** Exteriorization of the  
644 placenta, umbilical cord clamped by Jean Louis Faure forceps. **E:** Identification of the  
645 placental insertion site. **F:** Meticulously remove of the placental bed until healthy tissues are  
646 reached.

647

648 **Figure 13:** caesarean Hysterectomy. Hysterorrhaphy (white arrow). Infracervical incision line  
649 (black arrow).

650

651 **Figure 14:** Quantile-Quantile (Q-Q) Plots for estimated blood loss.

652

653 **Figure 15:** GGraph of lost blood loss in two Groups.
